# Supplementary material
Source: PubMed Central journal article supplement (PMC1634770)
Supplement: rspb20063525s11.pdf [file rspb20063525s11.pdf]

## Supporting material follows

| <b>Family</b>   | <b>Hilbre</b> | <b>Monks Wood</b> | <b>UK</b> | <b>N. America</b> | <b>Australia</b> | <b>World</b> |
|-----------------|---------------|-------------------|-----------|-------------------|------------------|--------------|
| Acrididae       | 1             | 4                 | 11        | 550               | 712              | 9000         |
| Aeolothripidae  | 1             | 0                 | 11        | 57                | 24               | 250          |
| Aeshnidae       | 1             | 2                 | 8         | 34                | 43               | 500          |
| Agromyzidae     | 6             | 4                 | 300       | 493               | 150              | 2500         |
| Aleyrodidae     | 0             | 0                 | 19        | 100               | 31               | 1200         |
| Alydidae        | 0             | 0                 | 1         | 29                | 9                | 280          |
| Andrenidae      | 0             | 0                 | 67        | 1200              | 0                | 4000         |
| Anobiidae       | 0             | 6                 | 28        | 300               | 225              | 1500         |
| Anthocoridae    | 0             | 0                 | 27        | 85                | 24               | 500          |
| Anthomyiidae    | 4             | 0                 | 225       | 600               | 9                | 1500         |
| Anthophoridae   | 0             | 0                 | 43        | 920               | 194              | 4200         |
| Aphididae       | 8             | 0                 | 380       | 1350              | 157              | 2250         |
| Aphrophoridae   | 0             | 0                 | 9         | 23                | 12               | 850          |
| Apidae          | 6             | 18                | 27        | 57                | 14               | 1000         |
| Arctiidae       | 6             | 14                | 40        | 264               | 342              | 2500         |
| Asilidae        | 1             | 1                 | 27        | 900               | 640              | 5000         |
| Baetidae        | 1             | 0                 | 14        | 147               | 13               | 800          |
| Berytidae       | 0             | 4                 | 9         | 14                | 7                | 180          |
| Bibionidae      | 4             | 0                 | 19        | 78                | 32               | 780          |
| Blattellidae    | 0             | 0                 | 4         | 24                | 140              | 1750         |
| Blattidae       | 0             | 0                 | 3         | 6                 | 209              | 600          |
| Bombyliidae     | 0             | 1                 | 12        | 800               | 391              | 5000         |
| Bruchidae       | 0             | 4                 | 7         | 135               | 10               | 1300         |
| Buprestidae     | 0             | 3                 | 12        | 675               | 1200             | 14000        |
| Calliphoridae   | 4             | 16                | 33        | 80                | 140              | 1200         |
| Cantharidae     | 2             | 19                | 41        | 468               | 150              | 4000         |
| Carabidae       | 21            | 96                | 330       | 2270              | 1690             | 25000        |
| Cecidomyiidae   | 5             | 0                 | 620       | 1060              | 112              | 4600         |
| Cephidae        | 0             | 5                 | 12        | 12                | 0                | 100          |
| Cerambycidae    | 0             | 0                 | 60        | 960               | 1200             | 25000        |
| Ceratopogonidae | 2             | 22                | 165       | 460               | 174              | 2000         |
| Cercopidae      | 2             | 0                 | 1         | 33                | 9                | 1400         |
| Chironomidae    | 16            | 3                 | 400       | 820               | 202              | 5000         |
| Chloropidae     | 9             | 7                 | 142       | 280               | 300              | 2000         |
| Chrysididae     | 0             | 1                 | 33        | 230               | 76               | 3000         |
| Chrysomelidae   | 4             | 56                | 254       | 1480              | 3000             | 30000        |
| Chrysopidae     | 1             | 6                 | 14        | 88                | 55               | 1600         |
| Cicadellidae    | 18            | 67                | 262       | 2700              | 664              | 21000        |
| Cicadidae       | 0             | 0                 | 1         | 166               | 250              | 2500         |

|                       |    |     |     |      |      |       |
|-----------------------|----|-----|-----|------|------|-------|
| Cicindellidae         | 0  | 0   | 6   | 108  | 110  | 2000  |
| Cimicidae             | 2  | 5   | 4   | 14   | 1    | 90    |
| Cleridae              | 0  | 5   | 10  | 270  | 350  | 3500  |
| Coccidae              | 0  | 0   | 35  | 92   | 80   | 1250  |
| Coccinellidae         | 8  | 20  | 41  | 400  | 300  | 5000  |
| Coenagrionidae        | 1  | 3   | 12  | 92   | 30   | 1000  |
| Coleophoridae         | 4  | 1   | 101 | 168  | 30   | 800   |
| Colletidae            | 1  | 0   | 20  | 155  | 860  | 3000  |
| Coreidae              | 0  | 0   | 10  | 120  | 57   | 2000  |
| Corixidae             | 5  | 10  | 34  | 132  | 31   | 525   |
| Cossidae              | 0  | 0   | 3   | 45   | 200  | 1000  |
| Culicidae             | 0  | 18  | 36  | 150  | 275  | 3100  |
| Curculionidae         | 18 | 88  | 400 | 2700 | 6000 | 41000 |
| Cydnidae              | 0  | 0   | 9   | 36   | 43   | 400   |
| Danaidae              | 0  | 1   | 1   | 4    | 12   | 300   |
| Delphacidae           | 3  | 8   | 70  | 145  | 64   | 1800  |
| Dermeestidae          | 0  | 6   | 16  | 130  | 150  | 800   |
| Diprionidae           | 0  | 0   | 7   | 41   | 0    | 100   |
| Dolichopodidae        | 14 | 23  | 270 | 1230 | 320  | 5500  |
| Drosophilidae         | 5  | 10  | 52  | 117  | 247  | 2900  |
| Dytiscidae            | 8  | 20  | 110 | 475  | 177  | 3500  |
| Ectopsocidae          | 0  | 0   | 1   | 9    | 25   | 120   |
| Elateridae            | 3  | 17  | 65  | 890  | 800  | 8500  |
| Embiop all 8 families | 0  | 0   | 0   | 10   | 65   | 200   |
| Empidae               | 16 | 31  | 350 | 730  | 88   | 3500  |
| Ephemeroidea          | 0  | 0   | 3   | 13   | 0    | 150   |
| Ephydriidae           | 4  | 5   | 130 | 430  | 85   | 1400  |
| Erotylidae            | 0  | 2   | 7   | 65   | 50   | 2000  |
| Formicidae            | 3  | 7   | 42  | 600  | 3000 | 8800  |
| Gelechiidae           | 5  | 3   | 145 | 635  | 1580 | 4200  |
| Geometridae           | 44 | 111 | 270 | 1400 | 2310 | 18000 |
| Geotrupidae           | 2  | 1   | 8   | 51   | 140  | 550   |
| Gerridae              | 2  | 3   | 9   | 45   | 32   | 500   |
| Gracillariidae        | 3  | 5   | 80  | 280  | 450  | 1200  |
| Gryllidae             | 0  | 0   | 3   | 96   | 715  | 1800  |
| Gryllotalpidae        | 0  | 0   | 1   | 7    | 10   | 60    |
| Gyrinidae             | 1  | 1   | 12  | 58   | 20   | 750   |
| Halictidae            | 2  | 0   | 58  | 502  | 382  | 5000  |
| Heleomyzidae          | 1  | 5   | 60  | 115  | 67   | 500   |
| Hemerobiidae          | 1  | 9   | 29  | 58   | 35   | 900   |
| Heptageniidae         | 0  | 0   | 11  | 133  | 0    | 550   |
| Hesperiidae           | 2  | 6   | 8   | 300  | 122  | 3500  |

|                 |    |     |     |      |      |       |
|-----------------|----|-----|-----|------|------|-------|
| Hippoboscidae   | 0  | 0   | 10  | 30   | 30   | 200   |
| Hydrometridae   | 0  | 1   | 2   | 9    | 8    | 110   |
| Hydroptilidae   | 1  | 0   | 29  | 200  | 101  | 1000  |
| Labiduridae     | 0  | 0   | 1   | 1    | 15   | 75    |
| Labiidae        | 0  | 0   | 2   | 9    | 15   | 512   |
| Lampyridae      | 0  | 1   | 2   | 128  | 25   | 2000  |
| Lasiocampidae   | 1  | 6   | 11  | 35   | 90   | 1500  |
| Lepismatidae    | 0  | 0   | 2   | 13   | 16   | 200   |
| Leptophlebiidae | 0  | 0   | 6   | 70   | 54   | 600   |
| Lestidae        | 0  | 0   | 2   | 18   | 14   | 200   |
| Leuctridae      | 0  | 0   | 6   | 45   | 0    | 200   |
| Libellulidae    | 0  | 1   | 13  | 91   | 55   | 1250  |
| Limnephilidae   | 8  | 9   | 54  | 310  | 3    | 1500  |
| Lucanidae       | 0  | 2   | 3   | 32   | 85   | 1250  |
| Lycaenidae      | 3  | 9   | 18  | 138  | 140  | 6000  |
| Lygaeidae       | 5  | 7   | 75  | 300  | 401  | 3500  |
| Lymantriidae    | 2  | 4   | 10  | 35   | 129  | 2600  |
| Machilidae      | 1  | 0   | 7   | 14   | 0    | 250   |
| Mantidae        | 0  | 0   | 0   | 20   | 116  | 1400  |
| Megachilidae    | 0  | 0   | 40  | 682  | 171  | 3000  |
| Meloidae        | 0  | 0   | 9   | 315  | 60   | 2000  |
| Membracidae     | 0  | 1   | 2   | 258  | 57   | 2500  |
| Menoponidae     | 0  | 0   | 146 | 260  | 50   | 650   |
| Miridae         | 12 | 65  | 210 | 1950 | 600  | 7000  |
| Mordellidae     | 0  | 6   | 10  | 207  | 120  | 1250  |
| Muscidae        | 16 | 50  | 275 | 622  | 180  | 3000  |
| Mutillidae      | 0  | 0   | 3   | 480  | 500  | 5000  |
| Mycetophilidae  | 3  | 7   | 420 | 720  | 250  | 3000  |
| Myrmeleontidae  | 0  | 0   | 0   | 80   | 250  | 1000  |
| Nabidae         | 1  | 7   | 13  | 48   | 20   | 400   |
| Nepidae         | 1  | 0   | 2   | 13   | 10   | 200   |
| Nitidulidae     | 2  | 29  | 95  | 185  | 300  | 2800  |
| Noctuidae       | 83 | 152 | 350 | 3000 | 2000 | 25000 |
| Notonectidae    | 1  | 3   | 4   | 35   | 40   | 300   |
| Nymphalidae     | 11 | 13  | 18  | 140  | 85   | 3500  |
| Oecophoridae    | 8  | 2   | 80  | 230  | 5550 | 3500  |
| Oestridae       | 0  | 0   | 10  | 1    | 3    | 160   |
| Panorpidae      | 0  | 0   | 3   | 40   | 0    | 360   |
| Papilionidae    | 0  | 0   | 1   | 35   | 18   | 700   |
| Pediculidae     | 0  | 0   | 1   | 1    | 1    | 2     |
| Pentatomidae    | 1  | 3   | 18  | 250  | 391  | 5250  |
| Perlodidae      | 1  | 0   | 5   | 98   | 0    | 250   |
| Phasmatidae     | 0  | 0   | 0   | 1    | 100  | 600   |
| Phlaeothripidae | 1  | 0   | 38  | 348  | 267  | 2700  |

|                 |    |     |     |      |          |       |
|-----------------|----|-----|-----|------|----------|-------|
| Phoridae        | 3  | 0   | 277 | 360  | 90       | 2800  |
| Phryganeidae    | 0  | 0   | 10  | 26   | 0        | 500   |
| Pieridae        | 5  | 7   | 10  | 65   | 32       | 1300  |
| Plutellidae     | 0  | 0   | 19  | 52   | 78       | 380   |
| Pompilidae      | 0  | 0   | 41  | 290  | 231      | 4000  |
| Pseudococcidae  | 0  | 0   | 35  | 280  | 240      | 2000  |
| Psilidae        | 2  | 2   | 28  | 35   | 2        | 250   |
| Psocidae        | 0  | 3   | 12  | 62   | 60       | 500   |
| Psychodidae     | 6  | 1   | 76  | 91   | 115      | 1000  |
| Psyllidae       | 3  | 0   | 78  | 260  | 330      | 1500  |
| Pulicidae       | 0  | 2   | 9   | 16   | 19       | 200   |
| Pyralidae       | 25 | 28  | 165 | 1380 | 1670     | 17500 |
| Raphidiidae     | 0  | 2   | 4   | 18   | 0        | 85    |
| Reduviidae      | 0  | 1   | 6   | 110  | 300      | 5500  |
| Rhinotermitidae | 0  | 0   | 0   | 9    | 30       | 200   |
| Rhopalidae      | 0  | 1   | 8   | 36   | 6        | 150   |
| Saldidae        | 2  | 1   | 22  | 76   | 16       | 300   |
| Sarcophagidae   | 1  | 0   | 55  | 330  | 67       | 2100  |
| Saturniidae     | 0  | 0   | 1   | 69   | 16       | 1100  |
| Satyridae       | 0  | 7   | 11  | 50   | 25       | 2000  |
| Scarabaeidae    | 2  | 11  | 89  | 1400 | 2189     | 20000 |
| Scathophagidae  | 4  | 0   | 53  | 148  | 0        | 250   |
| Scolytidae      | 0  | 10  | 54  | 500  | See note | 9000  |
| Sepsidae        | 3  | 7   | 26  | 35   | 16       | 250   |
| Sesiidae        | 0  | 3   | 15  | 120  | 19       | 1000  |
| Sialidae        | 0  | 1   | 2   | 23   | 4        | 75    |
| Silphidae       | 0  | 27  | 21  | 42   | 3        | 250   |
| Simuliidae      | 0  | 5   | 37  | 150  | 38       | 1500  |
| Siricidae       | 0  | 0   | 1   | 20   | 1        | 100   |
| Sphaeroceridae  | 13 | 0   | 110 | 120  | 60       | 950   |
| Sphecidae       | 1  | 2   | 115 | 1140 | 744      | 8000  |
| Sphingidae      | 5  | 8   | 18  | 124  | 65       | 1200  |
| Staphylinidae   | 23 | 290 | 825 | 3200 | 1200     | 27000 |
| Stenopsocidae   | 0  | 0   | 3   | 1    | 1        | 45    |
| Stratiomyidae   | 2  | 0   | 50  | 260  | 92       | 1800  |
| Stylopidae      | 0  | 0   | 13  | 80   | 65       | 260   |
| Syrphidae       | 23 | 52  | 245 | 870  | 169      | 6000  |
| Tabanidae       | 0  | 7   | 28  | 350  | 243      | 4100  |
| Tenebrionidae   | 4  | 1   | 37  | 1008 | 1500     | 15000 |
| Tenthredinidae  | 13 | 23  | 400 | 735  | 4        | 4000  |
| Tephritidae     | 3  | 8   | 72  | 280  | 135      | 4500  |
| Tetrigidae      | 0  | 0   | 3   | 29   | 70       | 1000  |
| Tettigoniidae   | 0  | 4   | 6   | 243  | 900      | 5000  |
| Thripidae       | 2  | 0   | 105 | 265  | 128      | 1500  |
| Tineidae        | 2  | 0   | 47  | 180  | 440      | 2500  |

|                |     |      |       |       |       |        |
|----------------|-----|------|-------|-------|-------|--------|
| Tingidae       | 0   | 7    | 23    | 160   | 148   | 1820   |
| Tiphiidae      | 0   | 0    | 3     | 225   | 750   | 1500   |
| Tipulidae      | 15  | 20   | 318   | 1525  | 704   | 15000  |
| Tortricidae    | 21  | 31   | 308   | 1060  | 1230  | 4500   |
| Trichodectidae | 0   | 0    | 21    | 137   | 6     | 350    |
| Vespidae       | 2   | 5    | 30    | 415   | 370   | 3800   |
| 176 families   | 619 | 1738 | 12161 | 62956 | 58974 | 615669 |

Note: the 6000 Australian species of Curculionidae includes the Scolytidae

Supporting Table 2 follows

**Table S2 - Analysis of the occurrence of 'peaks' and 'troughs' within the size-frequency distributions in Fig. 2 - in specific size classes, across all spatial scales. The extent to which they co-occur in particular size classes is statistically significant (based on exact two-way Chi-square test of association) and measured by Kappa's coefficient of association (0 = no association, 1 = perfect association) (StatXact for Windows 4, 1998)**

| Plotting body size (mm) | Hilbre                                   | Monks Wood       | UK           | N. America    | World         |                                                                                    |
|-------------------------|------------------------------------------|------------------|--------------|---------------|---------------|------------------------------------------------------------------------------------|
| 1.565                   | Hillside                                 | Hillside         | Hillside     | Hillside      | Hillside      |                                                                                    |
| 2.085                   | Hillside                                 | Hillside         | Hillside     | Hillside      | Hillside      |                                                                                    |
| 2.785                   | Peak                                     | Peak             | Peak         | Peak          | Peak          |                                                                                    |
| 3.71                    | Trough                                   | Trough           | Trough       | Trough        | Trough        |                                                                                    |
| 4.91                    | Hillside                                 | Hillside         | Hillside     | Hillside      | Hillside      |                                                                                    |
| 6.55                    | Peak                                     | Peak             | Peak         | Hillside      | Peak          |                                                                                    |
| 8.75                    | Hillside                                 | Hillside         | Hillside     | Peak          | Hillside      |                                                                                    |
| 11.65                   | Hillside                                 | Hillside         | Hillside     | Hillside      | Hillside      |                                                                                    |
| 15.65                   | Hillside                                 | Hillside         | Hillside     | Hillside      | Trough        |                                                                                    |
| 20.85                   | Trough                                   | Trough           | Hillside     | Hillside      | Peak          |                                                                                    |
| 27.85                   | Hillside                                 | Hillside         | Trough       | Trough        | Trough        |                                                                                    |
| 37.1                    | Peak                                     | Peak             | Peak         | Peak          | Peak          |                                                                                    |
| 49.1                    | Trough                                   | Trough           | Trough       | Trough        | Trough        |                                                                                    |
| 65.5                    | Peak                                     | Peak             | Peak         | Peak          | Peak          |                                                                                    |
|                         |                                          |                  |              |               |               |                                                                                    |
|                         |                                          |                  |              |               |               |                                                                                    |
|                         |                                          |                  |              |               |               |                                                                                    |
|                         | <b>Hilbre</b>                            | <b>MW</b>        | <b>UK</b>    | <b>NA</b>     | <b>World</b>  |                                                                                    |
| <b>Hilbre</b>           |                                          | <b>&lt;0.001</b> | <b>0.001</b> | <b>0.0353</b> | <b>0.0025</b> | <b>pairwise table of <i>p</i>-values for exact Chi-square tests of association</b> |
| <b>MW</b>               | <b>1</b>                                 |                  | <b>0.001</b> | <b>0.0353</b> | <b>0.0025</b> |                                                                                    |
| <b>UK</b>               | <b>0.77</b>                              | <b>0.77</b>      |              | <b>0.0003</b> | <b>0.0005</b> |                                                                                    |
| <b>NA</b>               | <b>0.54</b>                              | <b>0.54</b>      | <b>0.77</b>  |               | <b>0.0098</b> |                                                                                    |
| <b>World</b>            | <b>0.67</b>                              | <b>0.67</b>      | <b>0.78</b>  | <b>0.57</b>   |               |                                                                                    |
|                         |                                          |                  |              |               |               |                                                                                    |
|                         | <b>Kappa coefficients of association</b> |                  |              |               |               |                                                                                    |
|                         |                                          |                  |              |               |               |                                                                                    |

Supporting Table 3 follows

**Table S3 - The 176 Families used in the analysis**

| Family (after removal of parasitic wasps) | Geomean (mm) - corresponding to families in alphabetic order | Geomean (mm) - sorted on size | Family (after removal of parasitic wasps) |
|-------------------------------------------|--------------------------------------------------------------|-------------------------------|-------------------------------------------|
| Acrididae                                 | 28.28                                                        | 0.46                          | Dolichopodidae                            |
| Aeolothripidae                            | 1.41                                                         | 1.18                          | Thripidae                                 |
| Aeshnidae                                 | 77.78                                                        | 1.41                          | Aeolothripidae                            |
| Agromyzidae                               | 2.45                                                         | 1.41                          | Stylopidae                                |
| Aleyrodidae                               | 1.73                                                         | 1.73                          | Aleyrodidae                               |
| All (8) families Embioptera               | 7.75                                                         | 1.73                          | Trichodectidae                            |
| Alydidae                                  | 13.42                                                        | 1.90                          | Phoridae                                  |
| Andrenidae                                | 8.94                                                         | 2.24                          | Simuliidae                                |
| Anobiidae                                 | 2.83                                                         | 2.24                          | Sphaeroceridae                            |
| Anthocoridae                              | 3.16                                                         | 2.24                          | Stenopsocidae                             |
| Anthomyiidae                              | 4.90                                                         | 2.29                          | Ectopsocidae                              |
| Anthophoridae                             | 9.17                                                         | 2.29                          | Pediculidae                               |
| Aphididae                                 | 2.83                                                         | 2.45                          | Ceratopogonidae                           |
| Aphrophoridae                             | 8.49                                                         | 2.45                          | Chloropidae                               |
| Apidae                                    | 9.00                                                         | 2.45                          | Drosophilidae                             |
| Arctiidae                                 | 37.42                                                        | 2.45                          | Psocidae                                  |
| Asilidae                                  | 12.25                                                        | 2.45                          | Pulicidae                                 |
| Baetidae                                  | 6.00                                                         | 2.45                          | Agromyzidae                               |
| Berytidae                                 | 6.71                                                         | 2.45                          | Menoponidae                               |
| Bibionidae                                | 7.42                                                         | 2.45                          | Zorotypidae                               |
| Blattellidae                              | 14.14                                                        | 2.60                          | Phlaeothripidae                           |
| Blattidae                                 | 32.86                                                        | 2.74                          | Psyllidae                                 |
| Bombyliidae                               | 7.48                                                         | 2.74                          | Psychodidae                               |
| Bruchidae                                 | 4.47                                                         | 2.83                          | Aphididae                                 |
| Buprestidae                               | 11.40                                                        | 2.83                          | Cecidomyiidae                             |
| Calliphoridae                             | 8.00                                                         | 2.83                          | Scolytidae                                |
| Cantharidae                               | 9.49                                                         | 3.00                          | Chironomidae                              |
| Carabidae                                 | 13.04                                                        | 3.16                          | Coccinellidae                             |
| Cecidomyiidae                             | 2.83                                                         | 3.16                          | Anthocoridae                              |
| Cephidae                                  | 8.49                                                         | 3.16                          | Tingidae                                  |
| Cerambycidae                              | 23.24                                                        | 3.46                          | Dermestidae                               |
| Ceratopogonidae                           | 2.45                                                         | 3.46                          | Hydroptilidae                             |
| Cercopidae                                | 10.00                                                        | 3.46                          | Pseudococcidae                            |
| Chironomidae                              | 3.00                                                         | 3.46                          | Sepsidae                                  |
| Chloropidae                               | 2.45                                                         | 3.74                          | Nitidulidae                               |
| Chrysididae                               | 7.35                                                         | 4.00                          | Boreidae                                  |
| Chrysomelidae                             | 5.92                                                         | 4.06                          | Empidae                                   |
| Chrysopidae                               | 15.81                                                        | 4.24                          | Cimicidae                                 |
| Cicadellidae                              | 7.75                                                         | 4.24                          | Delphacidae                               |
| Cicadidae                                 | 35.57                                                        | 4.24                          | Hippoboscidae                             |
| Cicindellidae                             | 12.00                                                        | 4.47                          | Bruchidae                                 |

|                 |       |       |                  |
|-----------------|-------|-------|------------------|
| Cimicidae       | 4.24  | 4.47  | Cydnidae         |
| Cleridae        | 7.75  | 4.47  | Formicidae       |
| Coccidae        | 4.90  | 4.47  | Heleomyzidae     |
| Coccinellidae   | 3.16  | 4.58  | Saldidae         |
| Coenagrionidae  | 30.00 | 4.69  | Ephydriidae      |
| Coleophoridae   | 10.25 | 4.74  | Miridae          |
| Colletidae      | 7.35  | 4.90  | Coccidae         |
| Coreidae        | 20.00 | 4.90  | Muscidae         |
| Corixidae       | 6.71  | 4.90  | Psilidae         |
| Cossidae        | 38.73 | 4.90  | Anthomyiidae     |
| Culicidae       | 5.20  | 5.10  | Mycetophilidae   |
| Curculionidae   | 7.07  | 5.20  | Culicidae        |
| Cydnidae        | 4.47  | 5.48  | Mordellidae      |
| Danaidae        | 77.46 | 5.83  | Notonectidae     |
| Delphacidae     | 4.24  | 5.83  | Stratiomyidae    |
| Dermestidae     | 3.46  | 5.92  | Chrysomelidae    |
| Diprionidae     | 8.66  | 6.00  | Baetidae         |
| Dolichopodidae  | 0.46  | 6.00  | Lygaeidae        |
| Drosophilidae   | 2.45  | 6.00  | Nabidae          |
| Dytiscidae      | 8.25  | 6.16  | Gerridae         |
| Ectopsocidae    | 2.29  | 6.24  | Scathophagidae   |
| Elateridae      | 10.95 | 6.32  | Sarcophagidae    |
| Empidae         | 4.06  | 6.32  | Staphylinidae    |
| Ephemeridae     | 17.89 | 6.32  | Tephritidae      |
| Ephydriidae     | 4.69  | 6.71  | Corixidae        |
| Erotylidae      | 8.66  | 6.71  | Berytidae        |
| Formicidae      | 4.47  | 6.93  | Hemerobiidae     |
| Gelechiidae     | 13.75 | 6.93  | Rhinotermitidae  |
| Geometridae     | 24.25 | 6.93  | Gyrinidae        |
| Geotrupidae     | 14.49 | 7.07  | Curculionidae    |
| Gerridae        | 6.16  | 7.35  | Chrysididae      |
| Gracillariidae  | 9.38  | 7.35  | Colletidae       |
| Gryllidae       | 13.42 | 7.42  | Bibionidae       |
| Gryllotalpidae  | 30.00 | 7.48  | Leptophlebiidae  |
| Gyrinidae       | 6.93  | 7.75  | Cicadellidae     |
| Halictidae      | 7.75  | 7.75  | Cleridae         |
| Heleomyzidae    | 4.47  | 7.75  | Halictidae       |
| Hemerobiidae    | 6.93  | 7.75  | all (8) families |
| Heptageniidae   | 7.75  | 7.75  | Heptageniidae    |
| Hesperiidae     | 36.06 | 8.00  | Calliphoridae    |
| Hippoboscidae   | 4.24  | 8.060 | Membracidae      |
| Hydrometridae   | 10.25 | 8.12  | Tenthredinidae   |
| Hydroptilidae   | 3.46  | 8.25  | Dytiscidae       |
| Labiduridae     | 18.71 | 8.37  | Rhopalidae       |
| Labiidae        | 8.49  | 8.49  | Aphrophoridae    |
| Lampyridae      | 11.18 | 8.49  | Cephalidae       |
| Lasiocampidae   | 54.77 | 8.49  | Labiidae         |
| Lepismatidae    | 12.65 | 8.66  | Diprionidae      |
| Leptophlebiidae | 7.48  | 8.66  | Erotylidae       |



|                 |       |       |                 |
|-----------------|-------|-------|-----------------|
| Lestidae        | 45.25 | 8.66  | Mutillidae      |
| Libellulidae    | 44.72 | 8.94  | Andrenidae      |
| Limnephilidae   | 14.49 | 9.00  | Apidae          |
| Lucanidae       | 22.58 | 9.17  | Anthophoridae   |
| Lycaenidae      | 27.39 | 9.17  | Machilidae      |
| Lygaeidae       | 6.00  | 9.38  | Gracillariidae  |
| Lymantriidae    | 34.64 | 9.38  | Sphecidae       |
| Machilidae      | 9.17  | 9.49  | Cantharidae     |
| Mantidae        | 54.77 | 9.49  | Tenebrionidae   |
| Megachilidae    | 12.12 | 10.00 | Cercopidae      |
| Meloidae        | 13.23 | 10.10 | Syrphidae       |
| Membracidae     | 8.060 | 10.25 | Coleophoridae   |
| Menoponidae     | 2.45  | 10.25 | Hydrometridae   |
| Miridae         | 4.74  | 10.39 | Tetrigidae      |
| Mordellidae     | 5.48  | 10.95 | Elateridae      |
| Muscidae        | 4.90  | 10.95 | Tiphiidae       |
| Mutillidae      | 8.66  | 11.18 | Lampyridae      |
| Mycetophilidae  | 5.10  | 11.40 | Buprestidae     |
| Myrmeleontidae  | 64.81 | 12.00 | Cicindellidae   |
| Nabidae         | 6.00  | 12.12 | Megachilidae    |
| Nepidae         | 25.98 | 12.25 | Asilidae        |
| Nitidulidae     | 3.74  | 12.25 | Perlodidae      |
| Noctuidae       | 34.64 | 12.65 | Lepismatidae    |
| Notonectidae    | 5.83  | 12.65 | Tineidae        |
| Nymphalidae     | 57.45 | 12.96 | Raphidiidae     |
| Oecophoridae    | 15.23 | 12.96 | Tabanidae       |
| Oestridae       | 14.14 | 13.04 | Carabidae       |
| Panorpidae      | 15.00 | 13.23 | Meloidae        |
| Papilionidae    | 79.06 | 13.23 | Pentatomidae    |
| Pediculidae     | 2.29  | 13.42 | Alydidae        |
| Pentatomidae    | 13.23 | 13.42 | Gryllidae       |
| Perlodidae      | 12.25 | 13.75 | Gelechiidae     |
| Phasmatidae     | 57.01 | 14.14 | Oestridae       |
| Phlaeothripidae | 2.60  | 14.14 | Blattellidae    |
| Phoridae        | 1.90  | 14.14 | Sialidae        |
| Phryganeidae    | 17.66 | 14.14 | Silphidae       |
| Pieridae        | 37.42 | 14.14 | Vespidae        |
| Plutellidae     | 14.83 | 14.49 | Limnephilidae   |
| Pompilidae      | 16.58 | 14.49 | Geotrupidae     |
| Pseudococcidae  | 3.46  | 14.83 | Plutellidae     |
| Psilidae        | 4.90  | 15.00 | Panorpidae      |
| Psocidae        | 2.45  | 15.23 | Oecophoridae    |
| Psychodidae     | 2.74  | 15.81 | Chrysopidae     |
| Psyllidae       | 2.74  | 16.49 | Tortricidae     |
| Pulicidae       | 2.45  | 16.58 | Pompilidae      |
| Pyralidae       | 20.00 | 16.73 | Reduviidae      |
| Raphidiidae     | 12.96 | 17.32 | Scarabaeidae    |
| Reduviidae      | 16.73 | 17.66 | Grylloblattidae |
| Rhinotermitidae | 6.93  | 17.66 | Phryganeidae    |

|                |       |       |                |
|----------------|-------|-------|----------------|
| Rhopalidae     | 8.37  | 17.89 | Ephemeridae    |
| Saldidae       | 4.58  | 18.71 | Labiduridae    |
| Sarcophagidae  | 6.32  | 18.97 | Tipulidae      |
| Saturniidae    | 61.24 | 20.00 | Coreidae       |
| Satyridae      | 45.52 | 20.00 | Pyralidae      |
| Scarabaeidae   | 17.32 | 22.58 | Lucanidae      |
| Scathophagidae | 6.24  | 23.24 | Cerambycidae   |
| Scolytidae     | 2.83  | 23.66 | Sesiidae       |
| Sepsidae       | 3.46  | 24.25 | Geometridae    |
| Sesiidae       | 23.66 | 25.98 | Nepidae        |
| Sialidae       | 14.14 | 27.39 | Lycaenidae     |
| Silphidae      | 14.14 | 28.28 | Acrididae      |
| Simuliidae     | 2.24  | 28.28 | Siricidae      |
| Siricidae      | 28.28 | 30.00 | Coenagrionidae |
| Sphaeroceridae | 2.24  | 30.00 | Gryllotalpidae |
| Sphecidae      | 9.38  | 32.86 | Blattidae      |
| Sphingidae     | 72.46 | 33.54 | Tettigoniidae  |
| Staphylinidae  | 6.32  | 34.64 | Lymantriidae   |
| Stenopsocidae  | 2.24  | 34.64 | Noctuidae      |
| Stratiomyidae  | 5.83  | 35.57 | Cicadidae      |
| Stylopidae     | 1.41  | 36.06 | Hesperiidae    |
| Syrphidae      | 10.10 | 37.42 | Arctiidae      |
| Tabanidae      | 12.96 | 37.42 | Pieridae       |
| Tenebrionidae  | 9.49  | 38.73 | Cossidae       |
| Tenthredinidae | 8.12  | 44.72 | Libellulidae   |
| Tephritidae    | 6.32  | 45.25 | Lestidae       |
| Tetrigidae     | 10.39 | 45.52 | Satyridae      |
| Tettigoniidae  | 33.54 | 54.77 | Lasiocampidae  |
| Thripidae      | 1.18  | 54.77 | Mantidae       |
| Tineidae       | 12.65 | 57.01 | Phasmatidae    |
| Tingidae       | 3.16  | 57.45 | Nymphalidae    |
| Tiphiidae      | 10.95 | 61.24 | Saturniidae    |
| Tipulidae      | 18.97 | 64.81 | Myrmeleontidae |
| Tortricidae    | 16.49 | 72.46 | Sphingidae     |
| Trichodectidae | 1.73  | 77.46 | Danaidae       |
| Vespidae       | 14.14 | 77.78 | Aeshnidae      |
| Zorotypidae    | 2.45  | 79.06 | Papilionidae   |
| 176 families   |       |       |                |

**Fig. S1**

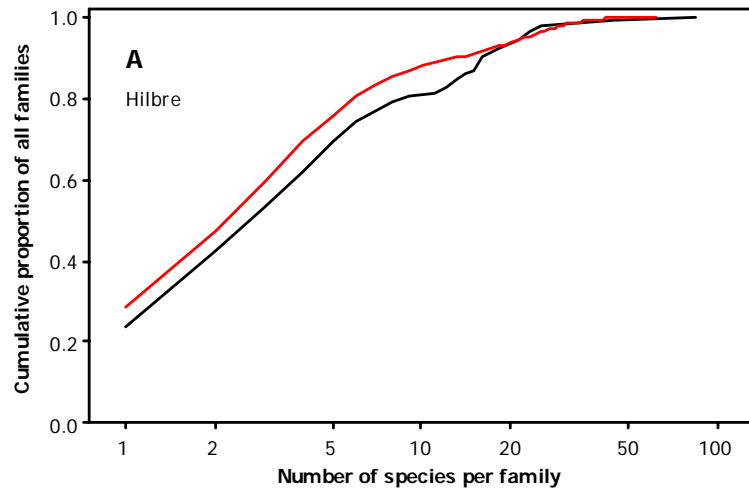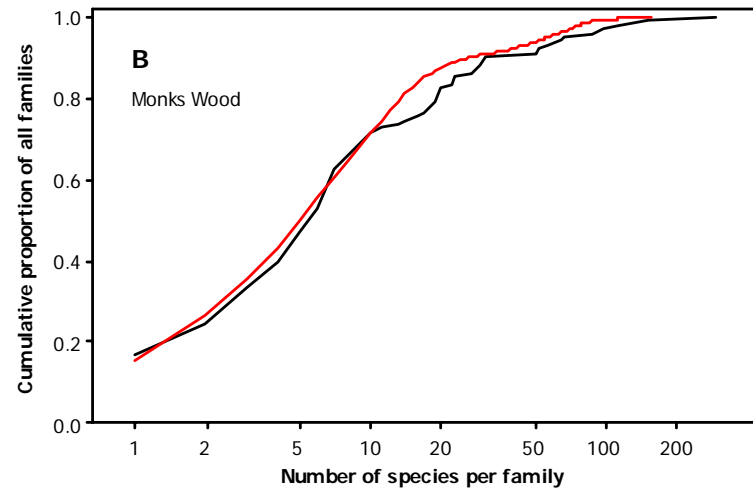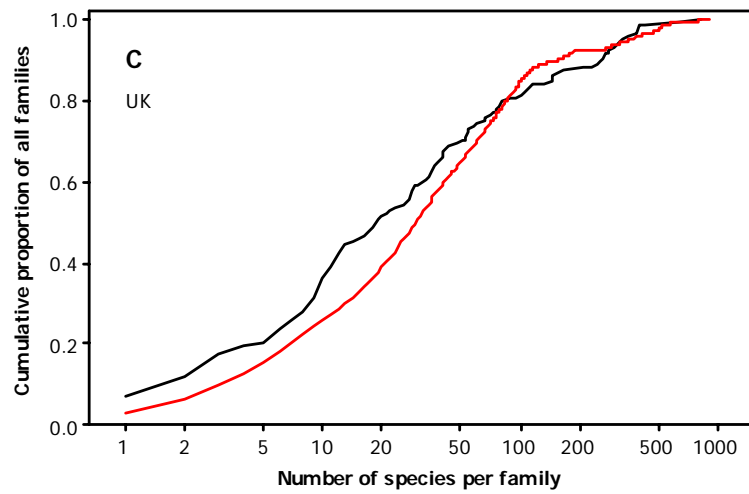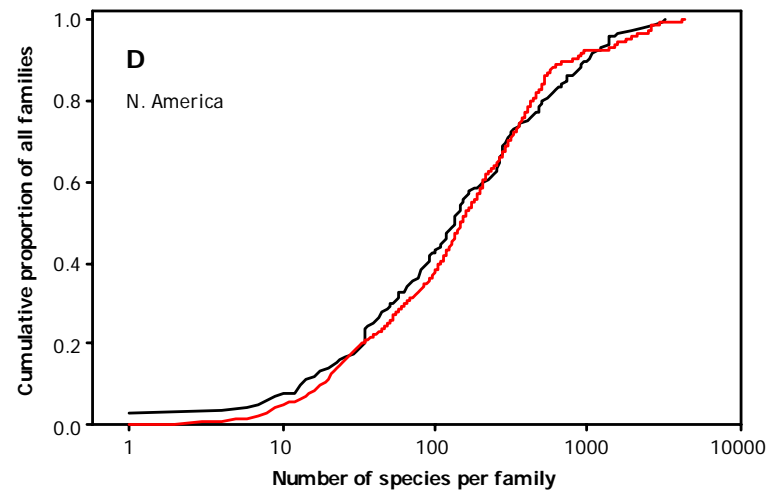

**Figure S1 (Legend)** – Comparison of the cumulative distributions of the proportion of families represented by  $k$  species. The observed distributions for (A) Hilbre, (B) Monks Wood, (C) UK and (D) North America are each compared with that expected by taking a random sub-sample of the same total number of species from the World dataset (Supporting Table 2). The expected was based on averaging the distributions of 1000 random sub-samples. The maximum differences (D) between observed and expected cumulative distribution were: 0.073 (Hilbre), 0.085 (Monks Wood), 0.142 (UK) and 0.076 (N. America). Based on similar random sub-sampling of the UK dataset, the values of D were 0.075 (Hilbre) and 0.099 (Monks Wood).
